# Supplementary material for: Environmental and vegetation control on active layer and soil temperature in an Arctic tundra ecosystem in Alaska
Source: Copernicus journal article supplement (doi:10.5194/bg-2023-117), 2023-09-04
Supplement: Supplementary file 1 [file bg-2023-117-supplement.pdf]

## Supplementary

**Table S1: Statistics of the collinearity test between all variables. Variables with both a correlation coefficient equal to or greater than an absolute value of 0.65 and a  $p$ -value of less than 0.05 were not included together in the same stepwise regression model.**

| <b>Variables</b>                                                       | <b>Correlation Coefficient</b> | <b><math>p</math>-value</b> |
|------------------------------------------------------------------------|--------------------------------|-----------------------------|
| Median Water Table, Median Soil Water Content                          | 0.71                           | < 0.001                     |
| Median Water Table, Deepest Thaw Depth ( $D_{thaw}$ )                  | 0.28                           | 0.002                       |
| Median Water Table, Maximum Soil Temperature: -15 cm                   | 0.34                           | < 0.001                     |
| Median Water Table, Maximum Soil Temperature: -10 cm                   | 0.15                           | 0.105                       |
| Median Water Table, Maximum Soil Temperature: -5 cm                    | -0.36                          | < 0.001                     |
| Median Water Table, Maximum Soil Temperature: -1 cm                    | -0.58                          | < 0.001                     |
| Median Water Table, Median Air Temperature                             | 0.29                           | 0.001                       |
| Median Water Table, Green Moss Layer Thickness                         | -0.35                          | < 0.001                     |
| Median Water Table, Total Moss Layer Thickness                         | -0.17                          | 0.069                       |
| Median Water Table, Median PAR                                         | 0.48                           | < 0.001                     |
| Median Water Table, Deviation from Mean Elevation (dz)                 | -0.48                          | < 0.001                     |
| Median Water Table, Temperature Difference (-1:-15 cm) ( $dT_{1-15}$ ) | -0.63                          | < 0.001                     |
| Median Soil Water Content, Deepest Thaw Depth ( $D_{thaw}$ )           | 0.14                           | 0.136                       |
| Median Soil Water Content, Maximum Soil Temperature: -15 cm            | 0.28                           | 0.003                       |
| Median Soil Water Content, Maximum Soil Temperature: -10 cm            | 0.22                           | 0.018                       |
| Median Soil Water Content, Maximum Soil Temperature: -5 cm             | -0.08                          | 0.420                       |
| Median Soil Water Content, Maximum Soil Temperature: -1 cm             | -0.33                          | < 0.001                     |
| Median Soil Water Content, Median Air Temperature                      | 0.25                           | 0.007                       |
| Median Soil Water Content, Green Moss Layer Thickness                  | -0.22                          | 0.018                       |
| Median Soil Water Content, Total Moss Layer Thickness                  | -0.13                          | 0.165                       |
| Median Soil Water Content, Median PAR                                  | 0.18                           | 0.056                       |
| Median Soil Water Content, Deviation from Mean Elevation (dz)          | -0.31                          | < 0.001                     |

|                                                                                       |       |         |
|---------------------------------------------------------------------------------------|-------|---------|
| Median Soil Water Content, Temperature Difference (-1:-15 cm) ( $dT_{1-15}$ )         | -0.39 | < 0.001 |
| Deepest Thaw Depth ( $D_{thaw}$ ), Maximum Soil Temperature: -15 cm                   | 0.06  | 0.555   |
| Deepest Thaw Depth ( $D_{thaw}$ ), Maximum Soil Temperature: -10 cm                   | 0.06  | 0.487   |
| Deepest Thaw Depth ( $D_{thaw}$ ), Maximum Soil Temperature: -5 cm                    | -0.27 | 0.004   |
| Deepest Thaw Depth ( $D_{thaw}$ ), Maximum Soil Temperature: -1 cm                    | -0.46 | < 0.001 |
| Deepest Thaw Depth ( $D_{thaw}$ ), Median Air Temperature                             | 0.09  | 0.327   |
| Deepest Thaw Depth ( $D_{thaw}$ ), Green Moss Layer Thickness                         | -0.19 | 0.041   |
| Deepest Thaw Depth ( $D_{thaw}$ ), Total Moss Layer Thickness                         | -0.10 | 0.265   |
| Deepest Thaw Depth ( $D_{thaw}$ ), Median PAR                                         | 0.36  | < 0.001 |
| Deepest Thaw Depth ( $D_{thaw}$ ), Deviation from Mean Elevation (dz)                 | -0.36 | < 0.001 |
| Deepest Thaw Depth ( $D_{thaw}$ ), Temperature Difference (-1:-15 cm) ( $dT_{1-15}$ ) | -0.43 | < 0.001 |
| Maximum Soil Temperature: -15 cm, Maximum Soil Temperature: -10 cm                    | 0.65  | < 0.001 |
| Maximum Soil Temperature: -15 cm, Maximum Soil Temperature: -5 cm                     | 0.21  | 0.023   |
| Maximum Soil Temperature: -15 cm, Maximum Soil Temperature: -1 cm                     | -0.13 | 0.163   |
| Maximum Soil Temperature: -15 cm, Median Air Temperature                              | 0.04  | 0.673   |
| Maximum Soil Temperature: -15 cm, Green Moss Layer Thickness                          | -0.28 | 0.002   |
| Maximum Soil Temperature: -15 cm, Total Moss Layer Thickness                          | -0.25 | 0.006   |
| Maximum Soil Temperature: -15 cm, Median PAR                                          | 0.17  | 0.063   |
| Maximum Soil Temperature: -15 cm, Deviation from Mean Elevation (dz)                  | -0.21 | 0.020   |
| Maximum Soil Temperature: -15 cm, Temperature Difference (-1:-15 cm) ( $dT_{1-15}$ )  | -0.46 | < 0.001 |
| Maximum Soil Temperature: -10 cm, Maximum Soil Temperature: -5 cm                     | 0.49  | < 0.001 |
| Maximum Soil Temperature: -10 cm, Maximum Soil Temperature: -1 cm                     | 0.04  | 0.665   |
| Maximum Soil Temperature: -10 cm, Median Air Temperature                              | -0.10 | 0.298   |
| Maximum Soil Temperature: -10 cm, Green Moss Layer Thickness                          | -0.29 | 0.001   |
| Maximum Soil Temperature: -10 cm, Total Moss Layer Thickness                          | -0.32 | < 0.001 |
| Maximum Soil Temperature: -10 cm, Median PAR                                          | -0.12 | 0.199   |
| Maximum Soil Temperature: -10 cm, Deviation from Mean Elevation (dz)                  | -0.18 | 0.056   |

|                                                                                               |       |         |
|-----------------------------------------------------------------------------------------------|-------|---------|
| Maximum Soil Temperature: -10 cm, Temperature Difference (-1:-15 cm)<br>(dT <sub>1_15</sub> ) | -0.19 | 0.042   |
| Maximum Soil Temperature: -5 cm, Maximum Soil Temperature: -1 cm                              | 0.68  | < 0.001 |
| Maximum Soil Temperature: -5 cm, Median Air Temperature                                       | -0.26 | 0.005   |
| Maximum Soil Temperature: -5 cm, Green Moss Layer Thickness                                   | 0.03  | 0.769   |
| Maximum Soil Temperature: -5 cm, Total Moss Layer Thickness                                   | -0.03 | 0.726   |
| Maximum Soil Temperature: -5 cm, Median PAR                                                   | -0.53 | < 0.001 |
| Maximum Soil Temperature: -5 cm, Deviation from Mean Elevation (dz)                           | 0.35  | < 0.001 |
| Maximum Soil Temperature: -5 cm, Temperature Difference (-1:-15 cm)<br>(dT <sub>1_15</sub> )  | 0.53  | < 0.001 |
| Maximum Soil Temperature: -1 cm, Median Air Temperature                                       | -0.25 | 0.006   |
| Maximum Soil Temperature: -1 cm, Green Moss Layer Thickness                                   | 0.31  | < 0.001 |
| Maximum Soil Temperature: -1 cm, Total Moss Layer Thickness                                   | 0.20  | 0.031   |
| Maximum Soil Temperature: -1 cm, Median PAR                                                   | -0.67 | < 0.001 |
| Maximum Soil Temperature: -1 cm, Deviation from Mean Elevation (dz)                           | 0.57  | < 0.001 |
| Maximum Soil Temperature: -1 cm, Temperature Difference (-1:-15 cm)<br>(dT <sub>1_15</sub> )  | 0.94  | < 0.001 |
| Median Air Temperature, Green Moss Layer Thickness                                            | 0.02  | 0.843   |
| Median Air Temperature, Total Moss Layer Thickness                                            | 0.07  | 0.462   |
| Median Air Temperature, Median PAR                                                            | 0.31  | < 0.001 |
| Median Air Temperature, Deviation from Mean Elevation (dz)                                    | -0.21 | 0.023   |
| Median Air Temperature, Temperature Difference (-1:-15 cm) (dT <sub>1_15</sub> )              | -0.24 | 0.009   |
| Green Moss Layer Thickness, Total Moss Layer Thickness                                        | 0.66  | < 0.001 |
| Green Moss Layer Thickness, Median PAR                                                        | -0.11 | 0.251   |
| Green Moss Layer Thickness, Deviation from Mean Elevation (dz)                                | 0.36  | < 0.001 |
| Green Moss Layer Thickness, Temperature Difference (-1:-15 cm)<br>(dT <sub>1_15</sub> )       | 0.38  | < 0.001 |
| Total Moss Layer Thickness, Median PAR                                                        | 0.04  | 0.642   |

|                                                                                                 |       |         |
|-------------------------------------------------------------------------------------------------|-------|---------|
| Total Moss Layer Thickness, Deviation from Mean Elevation (dz)                                  | 0.39  | < 0.001 |
| Total Moss Layer Thickness, Temperature Difference (-1:-15 cm) (dT <sub>1_15</sub> )            | 0.27  | 0.004   |
| Median PAR, Deviation from Mean Elevation (dz)                                                  | -0.38 | < 0.001 |
| Median PAR, Temperature Difference (-1:-15 cm) (dT <sub>1_15</sub> )                            | -0.66 | < 0.001 |
| Deviation from Mean Elevation (dz), Temperature Difference (-1:-15 cm)<br>(dT <sub>1_15</sub> ) | 0.58  | < 0.001 |
