# Supplementary material for: Environmental and vegetation control on active layer and soil temperature in an Arctic tundra ecosystem in Alaska
Source: Copernicus journal article supplement (doi:10.5194/bg-2023-117), 2023-09-04
Supplement: Supplementary file [file bg-2023-117-AC3-supplement.pdf]

**The paper describes a study where the relationship between moss properties and environmental variables like thaw depth, soil temperature and moisture are investigated. The basis for the analysis is a dataset consisting of two years of measurements of these variables along transects in the Alaskan tundra.**

**The authors run their dataset through various statistical models and find that**

**1. Moss layers drives larger temperature gradients in the ground and limits active layer thickness,**

**2. Surface temperatures are cooler in moister locations, and**

**3. That the topmost, live part of moss is important in regulating soil temperatures. The authors relate these findings to the low thermal conductivity of dry moss, the thermal conductivity and heat capacity of water, and the latent cooling associated with evaporation. The findings are briefly discussed.**

**After my reading of the paper, I find it to address a relevant research question, namely which factors regulate the energy transfer between the atmosphere and the ground in moss dominated ecosystems. While the topic of the paper is within the scope of Biogeosciences, I do not find it to present the novel and substantial scientific contribution that a publication in this journal necessitates. Most notably, the papers finding 1. and 2. are previously established relationships, and finding 3. is presenter without the appropriate discussion. Overall, I find that the paper has considerable shortcomings in several aspects including scientific significance, quality and presentation. I would thus recommend the authors to rewrite and resubmit the paper in an appropriate journal.**

We thank the referee for the considering our research question relevant and recommend avenues to improve the manuscript. We hope that after addressing these comments as well as those of the other referee, our manuscript will be considered appropriate for resubmission to this journal. The previous reviewer also highlighted how several interesting results of our study were not properly discussed and highlighted; we feel that by better developing the discussion and exploring additional statistical analysis, the novelty of our study will be clearer, and hope that our study will be considered appropriate for publication in Biogeosciences.

**The paper primarily investigates how soil temperatures and thaw depth are influenced by moss thickness and soil moisture, and the title should reflect that.**

This title change will be considered when revising the manuscript.

**The relevance, key aims, data sources and conclusions are presented in an orderly and appropriate way. As roughly ¼ of the introduction is about the risk of carbon release from permafrost soils, it would be appropriate to mention the processes through which mosses contribute to protecting this carbon stock. The vulnerability of mosses (Line 26-28) is also important context, but is not mentioned in the body of the paper (Introduction - conclusion).**

We will include a section in the abstract discussing the role of mosses in protecting the carbon stock as well as a section in the body of the paper on the vulnerability of mosses when revising the manuscript.

**The authors provide relevant background for their study, including the protected carbon stocks found in permafrost soils, positive feedback mechanisms upon permafrost degradation, and projected climate and wetness change. The paper however fails to revisit these important contexts in the discussion.**

This will be addressed in the revised manuscript, and the discussion will be further developed.

**A major issue in the introduction is that it is not made clear what research gap the authors investigate in the study. The goal is stated to be “to identify the biotic and abiotic controls regulating soil temperature and the thawing of the active layer”, while the paragraph from Line 52-62 describes that there already is an established scientific understanding of the role of mosses in this context. The introduction should clearly state what gap in current scientific understanding the paper is addressing, and why their method and study site is appropriate. If the paper mostly aims to confirm well-known relationships, there needs to be an argument for why it is still relevant. For example, that the authors have a focus on previously underrepresented ecosystems/study areas/climates, or that the study is more quantitative than previous ones.**

We will better highlight the knowledge gaps in the current literature, and how our study addressed it. The other reviewer has highlighted this shortcoming as well and had useful suggestions.

**The study site description does not provide the reader with a proper overview of the site that is investigated. Here, I feel there should be a description of the general area in terms of climate, topography and dominant ecosystems. The local site description needs also to address the representativity of the site - i.e. can findings from this site be used elsewhere, both regionally and globally? The study site description also markets other data and experiments (eddy covariance, Biocomplexity etc.) without any clear explanation of why these are relevant to the paper. Credit of previous research efforts should be limited to the acknowledgements, whereas the study site description simply cites the studies that provide the data or statements used in the current study.**

We will include a more detailed description of the general area and the representativity of the site in the revised manuscript. We will clarify the relevance of other data, for example data from the eddy covariance tower were used in this manuscript.

**I also find the sampling description to be ambiguous. Why do the authors choose to sample along these transects? Do they follow some environmental or topographical gradients of interest? It is also completely unclear what the measurement period is, i.e. do you sample weekly year-round or only in a limited period in summer? And are the temperature and moisture measurements instantaneous or daily values? Without such metadata and general information, it is not possible for the reader to assess whether the acquired dataset is suitable to answer the questions at hand.**

Sampling was conducted along the transects because of the presence of the boardwalk mentioned in the manuscript; conducting our sampling on these boardwalks allowed us to minimize disturbances to the tundra. Data was collected across 4 weeks in 2021 (July 8th – July 28th) and 4 weeks in 2022 (June 23rd – July 14th) for a total of 8 weeks of data during what would be the growth period for vegetation in the area. Temperature and moisture measurements are instantaneous measurements. These details will be clarified in the revised manuscript.

**For the environmental variables, all those that are used in the study need to be listed, potentially in a table also indicating their units, annual range and type of sensor. From line 136-137 it is unclear if these are all variables used in the study, or if there are additional ones not listed.**

We will include a table listing all the data collected and their intervals in the revised manuscript.

**This section (or the results) also lacks a short description of the data that is actually sampled. What are the annual ranges and averages? Was some sort of filtering applied? Are there clear clusters or thresholds for some of the variables?**

We will clarify this in the revised manuscript.

**I was surprised that the paper does not make an argument for the choice of statistical methods. While I am not an expert in statistical modelling, I would expect at least a simple statement to why the methods used in this study are suitable for the data and research question. This might be especially relevant as moisture has natural limits at 0 and 100%, and temperature has a hiatus around 0°C during thawing/freezing and thus does not behave linearly. I also found that stepwise regression is a controversial and partially discouraged method (e.g. Flom & Cassel (2007)), and I would expect the authors to comment on the applicability of this method.**

We will test additional statistical analyses as suggested by the other reviewer, and better explain our choices in the revised manuscript.

**It was also puzzling that in line 155 the depth -15 cm is stated to be “most consistently represented”, while in 120-121 says temperature is recorded every centimetre until 20 cm for each plot. If there are issues implementing the sampling routine outlined, this should be mentioned and explained. In general, the state and nature of the dataset and choice of methods is not described in a manner fostering replicability.**

This will be clarified in the updated manuscript.

**This section does not present the findings in a clear and straight forward manner. Figures are presented before they appear in the text, there is a mixture of variable names and symbols in both text and graphs, and the metrics such as “Akaike information criterion” are not explained. It is also not**

**clear which results are based on some sort of average and which are time series (e.g. Figure 4 where soil water contents are regressed against maximum temperatures).**

We will organize the order of the graphs for clarity and improve the flow in the updated manuscript. We will clarify metrics and averages as we revise the manuscript.

**While the topics brought forward here are of relevance for the study, this section fails to convey how this study takes research forward. That mosses insulate the soil from the atmosphere and that evaporation cools the surface are established concepts within the field. I do find it highly interesting that the topmost live layer of moss has such a strong impact on soil temperatures, and would have expected a more thorough discussion of possible processes.**

We thank the reviewer for highlighting some interesting results in our manuscript, which will be more clearly discussed in the revised manuscript.

**A major issue with the paper is that the discussion does not revisit the important context provided in the introduction; the carbon stocks in permafrost soils, positive climate feedback mechanisms, changes in precipitation and the vulnerability of moss ecosystems. Several of these topics are strongly linked to the authors findings, and a proper discussion of them would greatly improve the relevance of the paper. The paper also needs to address the quality and robustness of the sampling routine, data and methods used, and potentially outline suggested improvements.**

We will expand our discussion to include undiscussed topics in the updated manuscript.

**This section is concise and to the point. The statements that a wider range of soil moisture (line 307) and moss thickness (line 308) would be required to understand this topic comes as a surprise as this topic is not mentioned in the discussion. The conclusion should briefly present the aims and how they were/where not achieved, rather than presenting new topics.**

These are very useful comments that we will include in the revised manuscript. We realized that the discussion should be better developed and the novelty of the results, and the relevance of the data collected should be better highlighted.

We thank the referee once again for the comments on the manuscript. We hope that by highlighting the novelty of our results, our study will be considered a significant contribution in this field of research.
